# Supplementary material
Source: PubMed Central journal article supplement (PMC5812770)

## Procalcitonin as an Early Marker of the Need for Invasive Respiratory or Vasopressor Support in Adults With Community-Acquired Pneumonia

*Wesley H. Self, MD, MPH; Carlos G. Grijalva, MD, MPH; Derek J. Williams, MD, MPH; Alison Woodworth, PhD; Robert A. Balk, MD; Sherene Fakhran, MD; Yuwei Zhu, MD; D. Mark Courtney, MD; James Chappell, MD, PhD; Evan J. Anderson, MD; Chao Qi, PhD; Grant W. Waterer, MD, PhD; Christopher Trabue, MD; Anna M. Bramley, MPH; Seema Jain, MD; Kathryn M. Edwards, MD; and Richard G. Wunderink, MD*

CHEST 2016; 150(4):819-828

*Online supplements are not copyedited prior to posting and the author(s) take full responsibility for the accuracy of all data.*

© 2016 AMERICAN COLLEGE OF CHEST PHYSICIANS. Reproduction of this article is prohibited without written permission from the American College of Chest Physicians. See online for more details. DOI: 10.1016/j.chest.2016.04.010

**e-Appendix 1. Supplemental Results: PCT in viral and bacterial CAP**

The association of PCT with IRVS was evaluated separately in 192 (10.9%) patients with bacterial detections and 412 (23.4%) patients with viral detections. Patients with mixed bacterial-viral detections (2.9%), fungal/mycobacterial detections (0.9%) detections, and no detections (62.2%) were not included in this sub-analysis. Overall, PCT was higher in patients with bacteria (median: 1.14 ng/ml; IQR: 0.19, 8.09 ng/ml) than viruses (median: 0.09 ng/ml; IQR: < 0.05, 0.56 ng/ml) ( $p < 0.01$ ). IRVS was more common in the bacterial subgroup (17.2%) compared to the viral subgroup (5.1%) ( $p < 0.01$ ). Within both the viral and bacterial subgroups, higher PCT was associated with increased risk of IRVS (Table 2 in main paper).

Of the 192 patients with bacterial detections, 74 had positive blood cultures (bacteremia) and 118 did not have positive blood cultures (109 negative blood cultures; 9 blood cultures not done). Bacteremic patients had higher PCT (median 7.69 ng/ml; IQR: 1.23, 27.26 ng/ml) than patients with bacterial pneumonia without bacteremia (median 0.29 ng/ml; IQR: 0.07, 2.08 ng/ml). Areas under the ROC curve for IRVS among patients with bacteremia and those with bacterial pneumonia without bacteremia were 0.57 (95% CI: 0.42, 0.72) and 0.67 (95% CI: 0.50, 0.84), respectively (e-Table 4).

**e-Table 1.** American Thoracic Society Minor Criteria for Severe Community-Acquired Pneumonia.

---

**Criteria**

---

Respiratory rate  $\geq 30$ /minutePartial pressure of oxygen/ fraction of inspired Oxygen (PaO<sub>2</sub>/FiO<sub>2</sub> ratio)  $\leq 250$ 

Multilobar infiltrates

Confusion

Blood urea nitrogen (BUN)  $\geq 20$  mg/dLWhite blood cell count (WBC)  $< 4000$  cells/mm<sup>3</sup>Platelet count  $< 100,000$  cells/mm<sup>3</sup>Temperature  $< 36^{\circ}$  C

Hypotension requiring aggressive fluid resuscitation

(operationalized as a systolic blood pressure  $< 90$  mm Hg)

---

**e-Table 2.** Patient characteristics of included patients and patients from the Etiology of Pneumonia in the Community (EPIC) study cohort excluded due to no procalcitonin measurement at the time of hospital presentation.

| <b>Characteristic</b>                                               | <b>Included Patients<br/>(n = 1770)</b> | <b>Excluded Patients<br/>(n = 550)</b> |
|---------------------------------------------------------------------|-----------------------------------------|----------------------------------------|
| Age - median years (IQR)                                            | 57 (47, 70)                             | 60 (46, 72)                            |
| Female sex - n (%)                                                  | 905 (51.1)                              | 285 (51.8)                             |
| Race and ethnicity - n (%)                                          |                                         |                                        |
| Non-Hispanic White                                                  | 783 (44.2)                              | 303 (55.1)                             |
| Non-Hispanic Black                                                  | 693 (39.2)                              | 205 (37.3)                             |
| Hispanic                                                            | 215 (12.2)                              | 28 (5.1)                               |
| Other                                                               | 79 (4.5)                                | 14 (2.5)                               |
| Age Groups - n (%)                                                  |                                         |                                        |
| 18-44 years                                                         | 396 (22.4)                              | 128 (23.3)                             |
| 45-64 years                                                         | 766 (43.3)                              | 198 (36.0)                             |
| 65-79 years                                                         | 373 (21.1)                              | 144 (26.2)                             |
| ≥ 80 years                                                          | 235 (13.3)                              | 80 (14.6)                              |
| Chronic Medical Conditions - n (%)                                  |                                         |                                        |
| Asthma                                                              | 459 (25.9)                              | 139 (25.3)                             |
| Chronic Obstructive Lung Disease                                    | 367 (20.7)                              | 162 (29.5)                             |
| Cancer                                                              | 320 (18.1)                              | 96 (17.5)                              |
| Chronic Heart Failure                                               | 318 (18.0)                              | 122 (22.2)                             |
| Diabetes Mellitus                                                   | 438 (24.8)                              | 159 (28.9)                             |
| Chronic Kidney Disease                                              | 271 (15.3)                              | 95 (17.3)                              |
| Chronic Liver Disease                                               | 93 (5.3)                                | 37 (6.7)                               |
| Immunosuppression                                                   | 294 (16.6)                              | 87 (15.8)                              |
| HIV infection                                                       | 47 (2.7)                                | 21 (3.8)                               |
| Current Smoker                                                      | 463 (26.2)                              | 144 (26.2)                             |
| Pneumonia Severity Index Risk Class                                 |                                         |                                        |
| I                                                                   | 339 (19.2)                              | 90 (16.4)                              |
| II                                                                  | 474 (26.8)                              | 143 (26.0)                             |
| III                                                                 | 345 (19.5)                              | 119 (21.6)                             |
| IV                                                                  | 462 (26.1)                              | 144 (26.2)                             |
| V                                                                   | 150 (8.5)                               | 54 (9.8)                               |
| Pneumonia Etiology - n (%)                                          |                                         |                                        |
| Bacterial                                                           | 192 (10.9)                              | 66 (12.0)                              |
| Viral                                                               | 412 (23.3)                              | 121 (22.0)                             |
| Bacterial-Viral Mixed                                               | 51 (2.9)                                | 8 (1.5)                                |
| Fungal                                                              | 15 (0.9)                                | 2 (0.4)                                |
| Unknown                                                             | 1100 (62.2)                             | 353 (64.2)                             |
| Invasive Respiratory or Vasopressor Support within 72 hours - n (%) | 115 (6.5)                               | 24 (4.4)                               |
| Any ICU Admission - n (%)                                           | 397 (22.4)                              | 101 (18.4)                             |
| Hospital Length of Stay - median days (IQR)                         | 3 (2, 6)                                | 3 (2, 6)                               |
| In-hospital Death - n (%)                                           | 37 (2.1)                                | 15 (2.7)                               |

**e-Table 3.** Percentage of patients who experienced invasive respiratory or vasopressor support (IRVS) according to four selected procalcitonin (PCT) cut-points, representing the 50<sup>th</sup>, 75<sup>th</sup>, 90<sup>th</sup>, and 95<sup>th</sup> percentile of PCT concentration in the study population.

| PCT cut-point, ng/ml<br>(percentile) | Below PCT cut-point |             | Above PCT cut-point |             |
|--------------------------------------|---------------------|-------------|---------------------|-------------|
|                                      | n (%)               | IRVS, n (%) | n (%)               | IRVS, n (%) |
| 0.15 (50 <sup>th</sup> percentile)   | 870 (49)            | 30 (3.5)    | 900 (51)            | 85 (9.4)    |
| 0.83 (75 <sup>th</sup> percentile)   | 1327 (75)           | 52 (3.9)    | 443 (25)            | 63 (14.2)   |
| 4.98 (90 <sup>th</sup> percentile)   | 1593 (90)           | 77 (4.8)    | 177 (10)            | 38 (21.5)   |
| 15.96 (95 <sup>th</sup> percentile)  | 1681 (95)           | 95 (5.7)    | 89 (5)              | 20 (22.5)   |

**e-Table 4.** Serum procalcitonin (PCT) concentration among patients who did and did not receive intensive respiratory or vasopressor support (IRVS) within 72 hours after stratifying the bacterial CAP population into bacteremic and non-bacteremic sub-groups.

| Population                   | n   | IRVS, n (%) | Serum PCT, Median (IQR)<br>[ng/ml] |                    | AUC (95% CI)      |
|------------------------------|-----|-------------|------------------------------------|--------------------|-------------------|
|                              |     |             | IRVS Present                       | IRVS Absent        |                   |
| Bacterial CAP                | 192 | 33 (17.2%)  | 5.62 (1.10, 27.26)                 | 0.73 (0.14, 6.22)  | 0.68 (0.61, 0.75) |
| Bacterial Etiology Subgroups |     |             |                                    |                    |                   |
| Bacteremia                   | 74  | 19 (25.7%)  | 9.54 (1.43, 51.42)                 | 7.16 (0.95, 23.39) | 0.57 (0.43, 0.72) |
| No Bacteremia                | 118 | 14 (11.9%)  | 3.15 (0.19, 5.79)                  | 0.27 (0.06, 1.56)  | 0.67 (0.50, 0.84) |

**e-Figure 1.** Box and whisker plots of serum procalcitonin (PCT) concentration and white blood cell count (WBC) in patients who did (n = 115) and did not (n = 1655) require invasive respiratory or vasopressor support (IRVS). The center of each box plot represents the median, with the box denoting the interquartile range (IQR), the upper and lower whiskers representing 1.5-times the IQR above and below the 75% percentile and 25% percentile, respectively, and dots representing outliers beyond the whiskers. The y-axis is on a logarithmic scale.

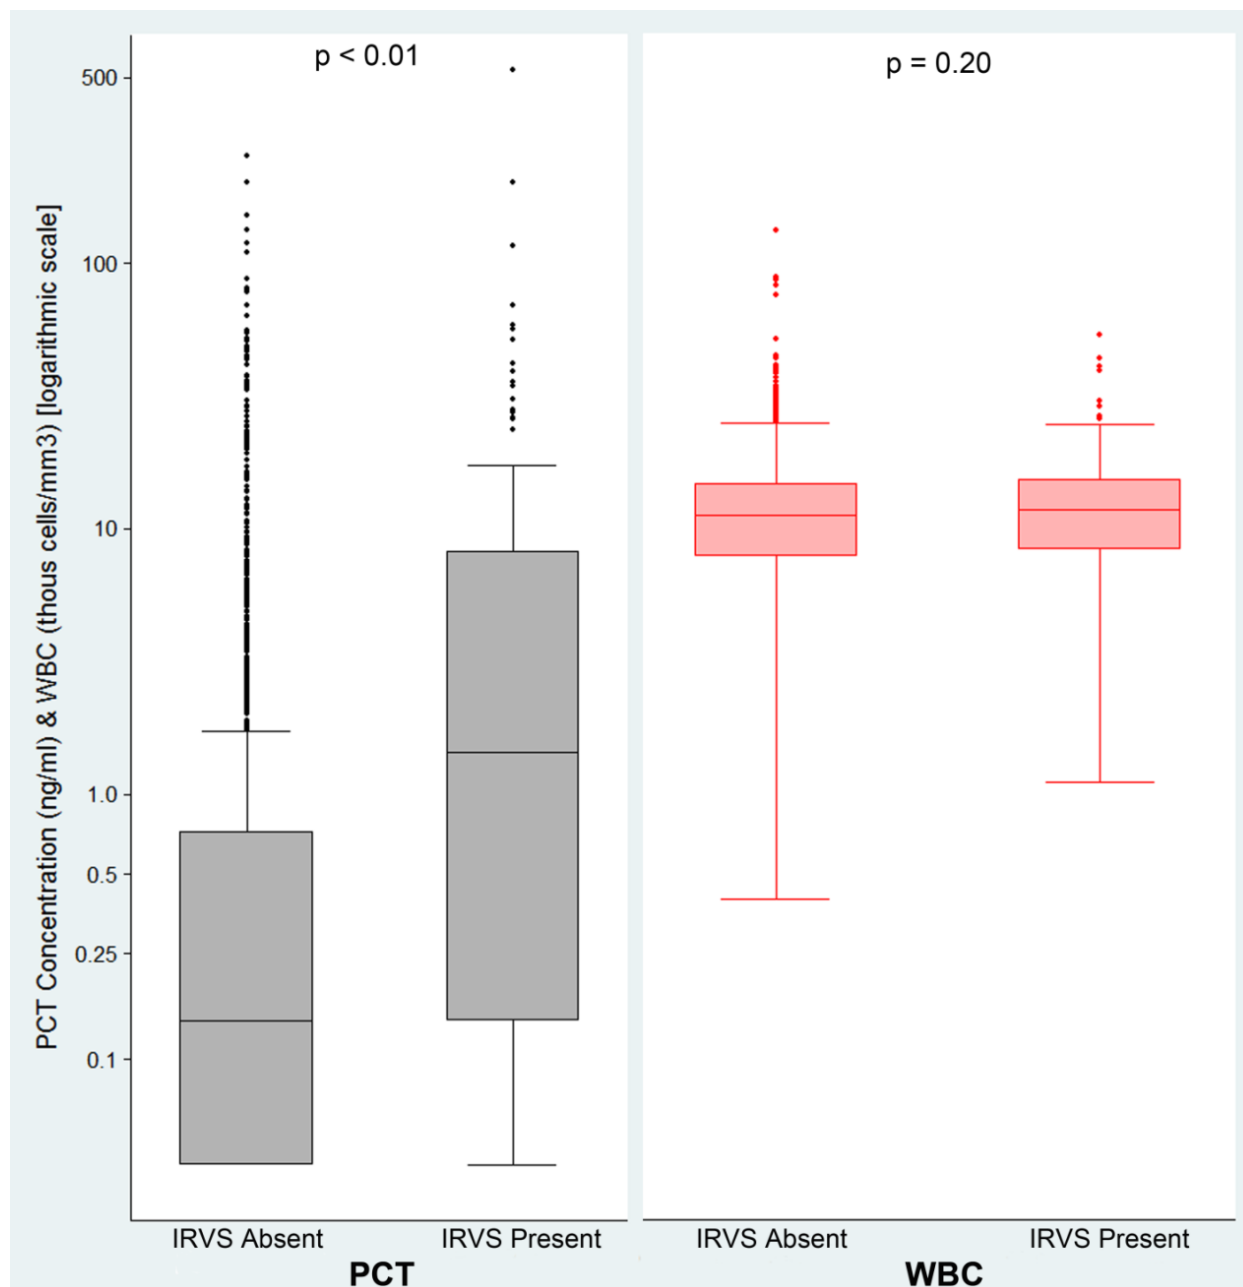

**e-Figure 2.** Box plots of serum procalcitonin (PCT) concentration by (a) number of American Thoracic Society (ATS) minor criteria; (b) Pneumonia Severity Index (PSI) Risk Class; and (c) SMART-COP score.

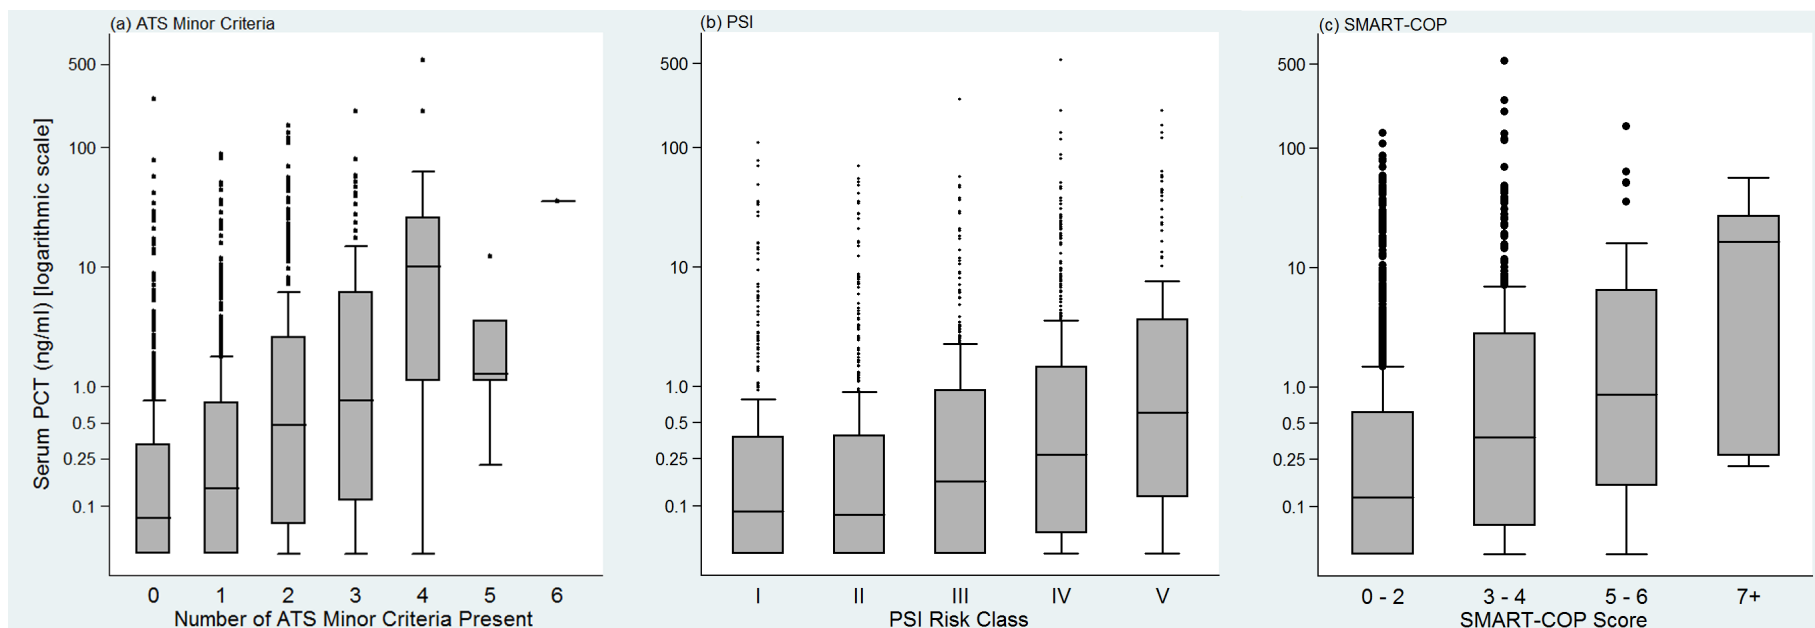

**e-Figure 3.** Box plots of serum procalcitonin (PCT) concentration in patients who did and did not require invasive respiratory or vasopressor support within 72 hours (IRVS), stratified by: (a) ATS minor criteria; (b) pneumonia severity index (PSI); and (c) SMART-COP.

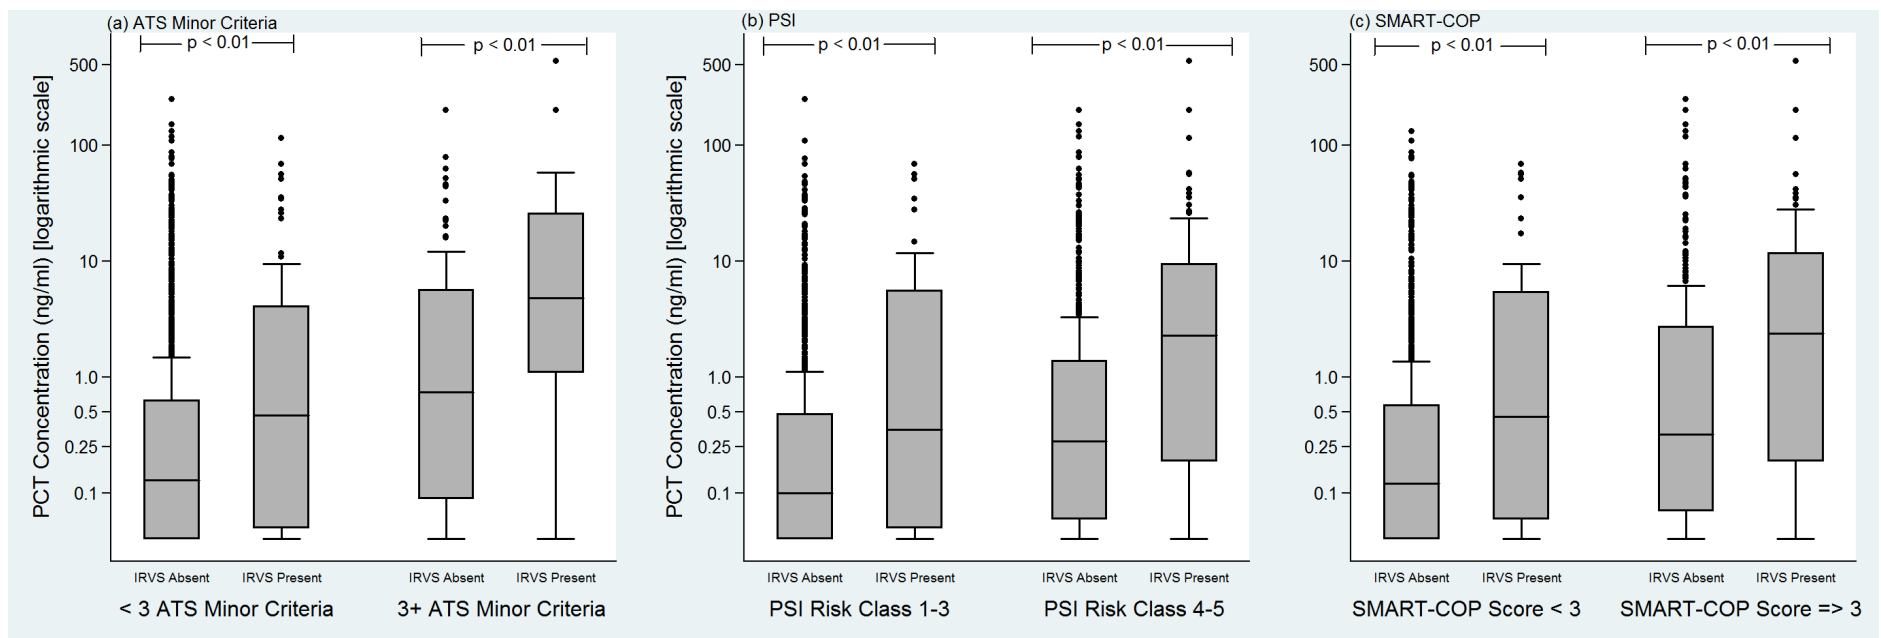

Supplement: mmc1.pdf [file mmc1.pdf]
